# Supplementary material
Source: PubMed Central journal article supplement (PMC129336)

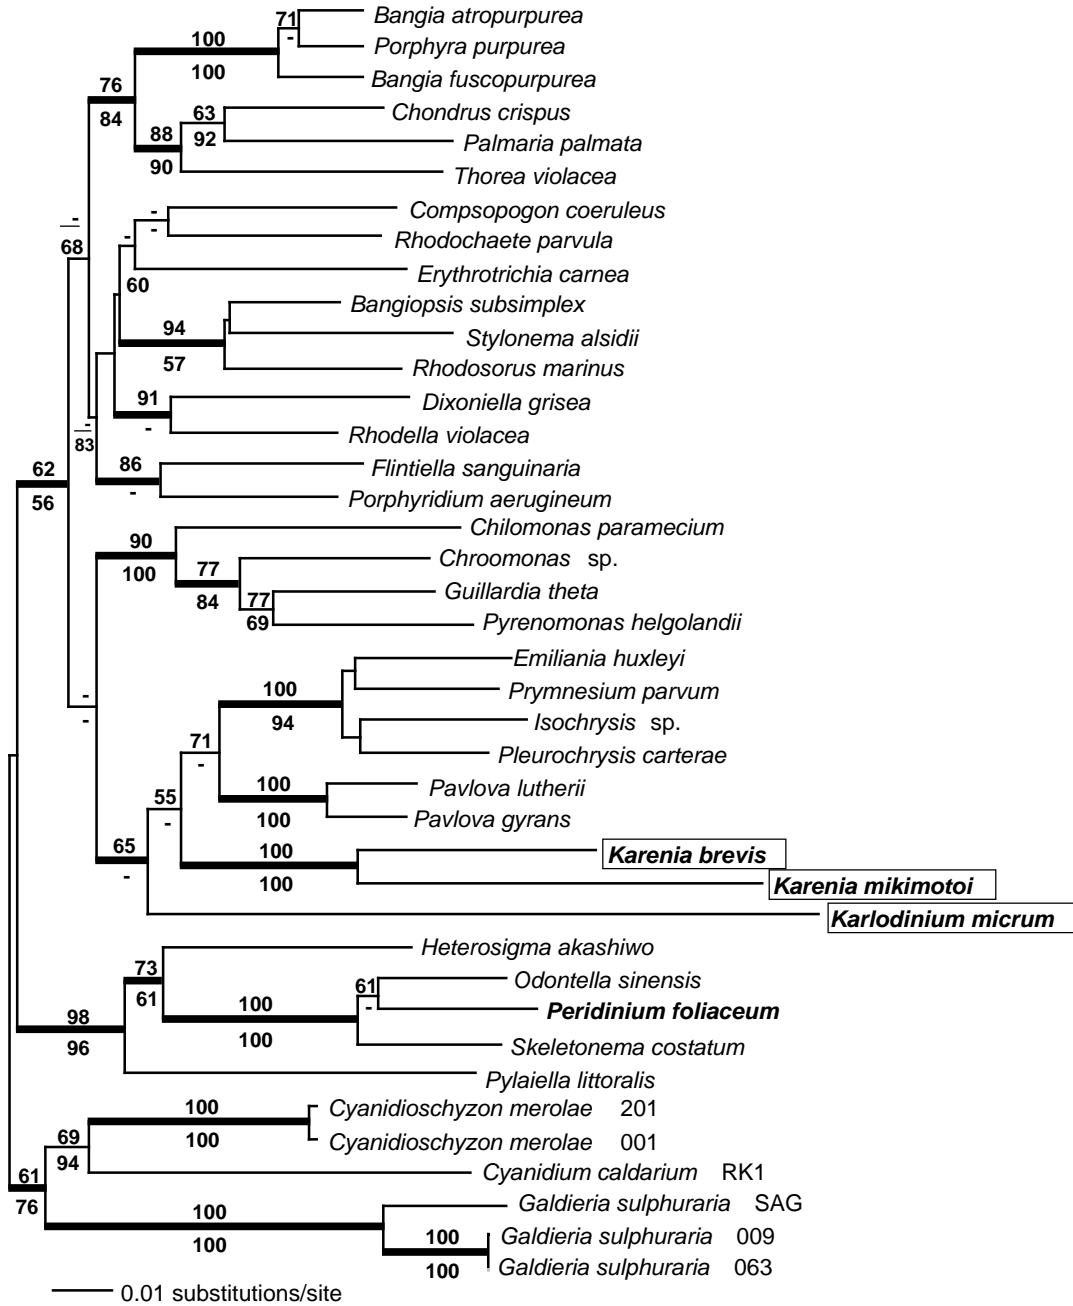

Supplement: pnas_172234799_6.pdf [file pnas_172234799_6.pdf]

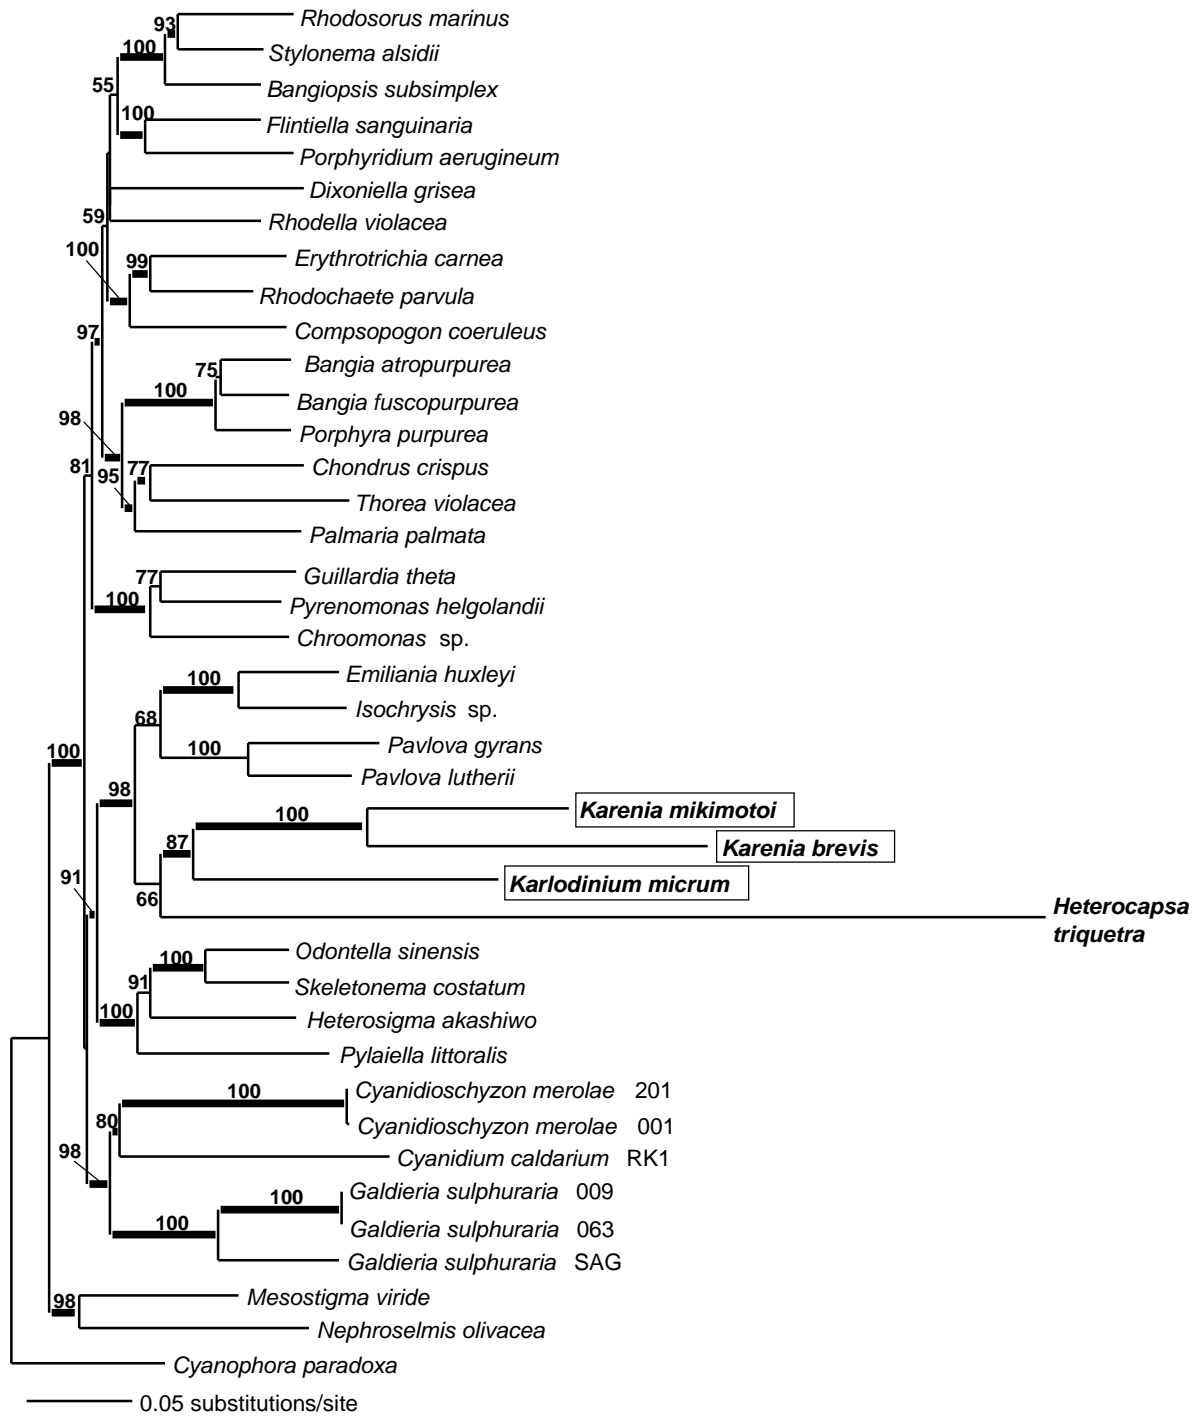

Supplement: pnas_172234799_7.pdf [file pnas_172234799_7.pdf]

Uncorrected p-distances

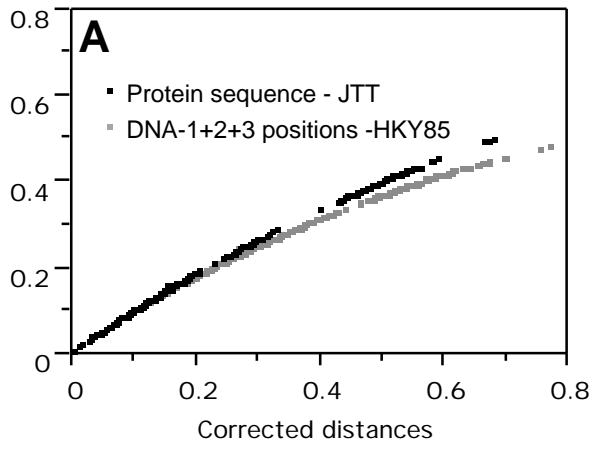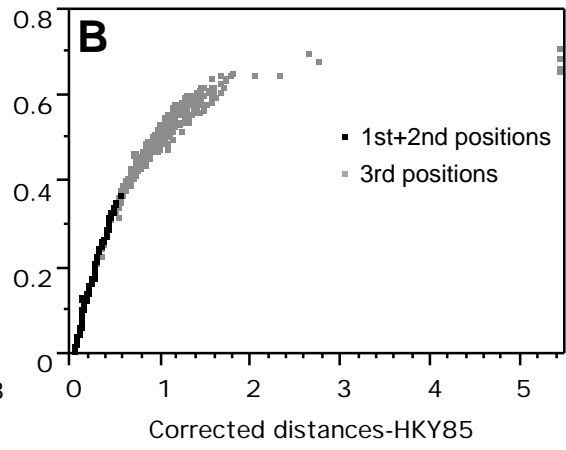

Supplement: pnas_172234799_8.pdf [file pnas_172234799_8.pdf]
